# Supplementary material for: Cardiovascular and renal multimorbidity increase risk of atrial fibrillation in the PREVEND cohort
Source: PubMed Central journal article supplement — Open Heart. 2023 Jul 17;10(2):e002315. doi: 10.1136/openhrt-2023-002315 (PMC10357795; doi:10.1136/openhrt-2023-002315), 2023-07-17
Supplement: openhrt-2023-002315supp001.pdf [file openhrt-2023-002315supp001.pdf]

Supplementary table 1. Characteristics of the population by latent classes

| Characteristic                 | Class 1<br>(n=5591) | Class 2<br>(n=2402) | Class 3<br>(n=272) | p-value |
|--------------------------------|---------------------|---------------------|--------------------|---------|
| Age (years)                    | 43.2 ± 9.9          | 60.5 ± 8.5          | 63.8 ± 7.9         | <0.001  |
| Men                            | 2584 (46.2%)        | 1313 (54.7%)        | 223 (82.0%)        | <0.001  |
| Caucasian ethnicity            | 5273 (95.0%)        | 2308 (97.2%)        | 263 (97.8%)        | <0.001  |
| Follow-up duration (years)     | 9.3 ± 2.0           | 9.2 ± 2.1           | 8.3 ± 2.7          | <0.001  |
| Number of comorbidities        | 1.0 (0.0 – 1.0)     | 2.0 (2.0 – 3.0)     | 4.0 (3.0 – 4.0)    | <0.001  |
| 0                              | 1410 (26.4%)        | 14 (0.6%)           | 0 (0.0%)           |         |
| 1-3                            | 3938 (73.6%)        | 1980 (89.2%)        | 112 (44.8%)        |         |
| ≥4                             | 0 (0.0%)            | 225 (10.1%)         | 138 (55.2%)        |         |
| Hypertension                   | 362 (6.7%)          | 2015 (85.5%)        | 165 (63.0%)        | <0.001  |
| Heart failure                  | 0 (0.0%)            | 0 (0.0%)            | 18 (6.6%)          | <0.001  |
| Diabetes Mellitus              | 17 (0.3%)           | 254 (10.8%)         | 39 (14.7%)         | <0.001  |
| Hypercholesterolemia           | 28 (0.5%)           | 202 (9.0%)          | 131 (50.0%)        | <0.001  |
| Obesity                        | 518 (9.4%)          | 718 (30.2%)         | 51 (18.9%)         | <0.001  |
| Previous myocardial infarction | 2 (0.0%)            | 0 (0.0%)            | 249 (92.2%)        | <0.001  |
| Previous stroke                | 22 (0.4%)           | 44 (1.8%)           | 15 (5.6%)          | <0.001  |
| Peripheral artery disease      | 60 (1.1%)           | 184 (8.1%)          | 47 (18.7%)         | <0.001  |
| Renal impairment               | 34 (0.6%)           | 375 (15.7%)         | 57 (21.0%)         | <0.001  |
| Microalbuminuria               | 3639 (65.1%)        | 1899 (79.1%)        | 221 (81.2%)        | <0.001  |

Secondary latent class analysis, based on age, sex, ethnicity, hypertension, heart failure, diabetes mellitus, hypercholesterolemia, obesity, previous myocardial infarction, previous stroke, peripheral artery disease, renal impairment, microalbuminuria and incident atrial fibrillation.

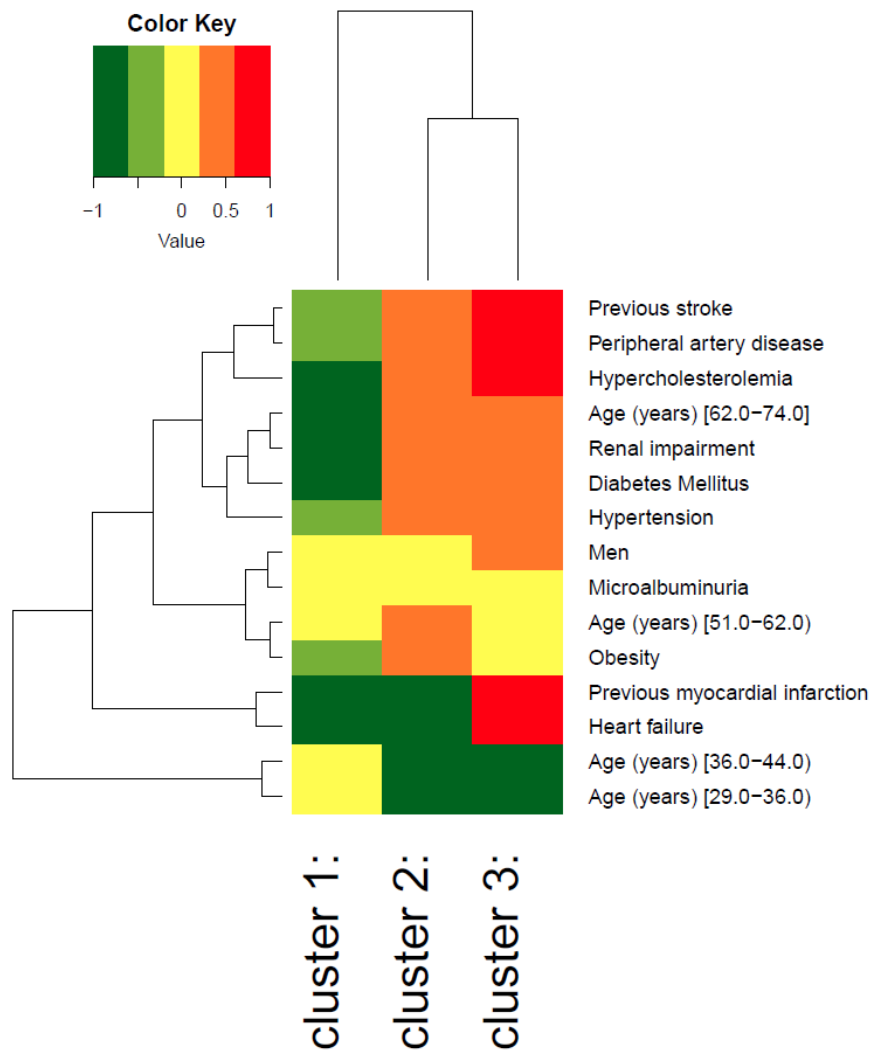

**Supplementary figure 1. Heat map of individual cardiovascular and renal comorbidities within each cluster** The colours represent the log relative risk of the presence of the comorbidity compared to the average individual in this cohort. The branching diagrams represent the hierarchy of categories based on degree of similarity between the comorbidities (rows) or clusters (columns).

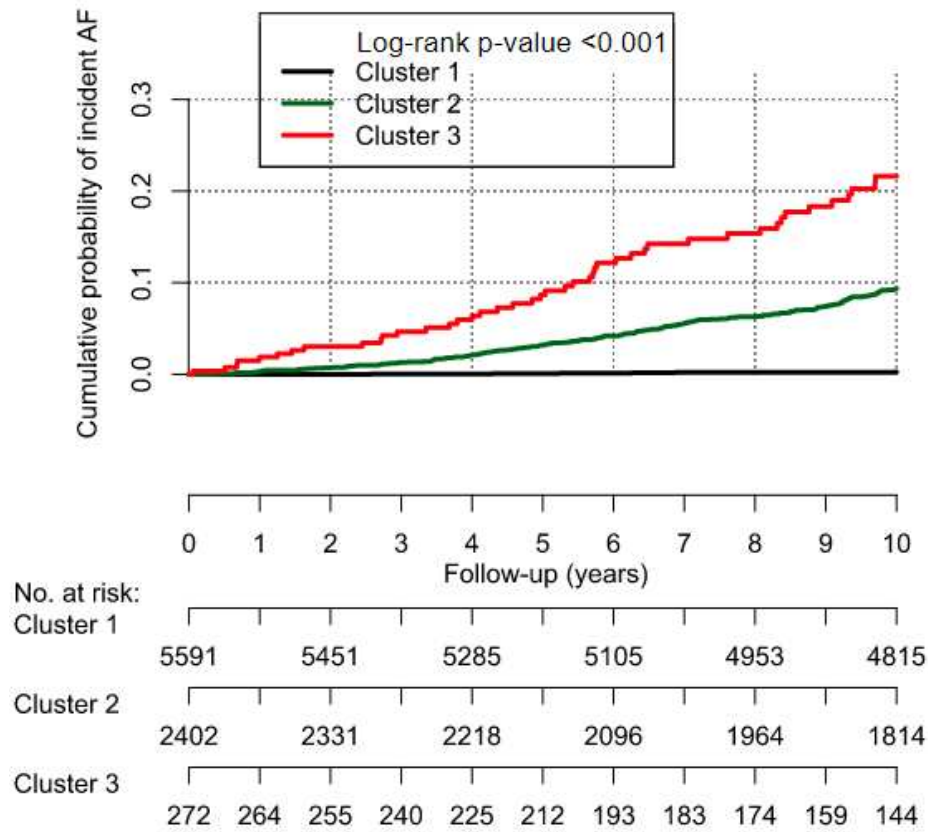

Supplementary figure 2. Cumulative probability of incident AF by comorbidity clusters
